# Supplementary material
Source: publisher figshare collection journal article supplement (https://tandf.figshare.com/ndownloader/files/15016742)
Supplement: Supplementary file 1 [file 15016742]

## Sheet: ScotFW2011_12_&_BGS_Jan_March05
Longitude WGS84	Latitude WGS84	Elevation [m]	d2HVSMOW	S.D.	d18OVSMOW	S.D.	d-excess	Date	LOCATION NAME
-7.44833	57.6517	8	-29.1	0.6	-4.11	0.07	3.78	w/c 08.03.2012	LOCH OLABHAT, WESTERN BAY
-7.40864	57.2198	3	-27.1	0.6	-3.94	0.13	4.42	w/c 08.03.2012	LOCH CHILL DONNAIN UARACH
-7.39638	57.219	4	-23.3	1.3	-3.47	0.09	4.46	26.03.2012	LOCH NA MUILNE (SOUTH UIST)
-7.38873	57.1484	2	-21.46	0.8	-3.37	0.17	2.66	w/c 26.03.2012	LOCH DUN NA CILLE (SOUTH UIST)
-7.37784	57.2954	4	-19.5	0.8	-2.87	0.26	0.66	w/c 26.03.2012	LOCH NAN CNAMH (SOUTH UIST)
-7.37409	57.2573	11	-28	0.7	-4.16	0.07	5.28	w/c 08.03.2012	MID LOCH OLLAY SOUTH UIST
-7.32968	57.3224	3	-28.2	1.1	-4.06	0.08	4.28	w/c 08.03.2012	LOCH DRUIDIBEG SOUTH UIST
-7.32956	57.4577	17	-24.9	0.2	-3.6	0.05	3.9	w/c 26.03.2012	LOCH a BHURSTA BENBECULA
-7.28133	57.5271	2	-23.2	0.8	-2.99	0.26	0.72	w/c 08.03.2012	LOCH CARAVAT
-7.26295	57.5823	10	-27.5	0.3	-4.13	0.17	5.54	w/c 08.03.2012	LOCH NAN EUN, NORTH UIST
-7.24035	57.5864	6	-25	0.6	-3.6	0.23	3.8	w/c 08.03.2012	NORTH LOCH SCADAVAY
-7.23597	57.5844	6	-24.1	0.2	-3.5	0.13	3.9	w/c 08.03.2012	SOUTH LOCH SCADAVAY, NORTH UIST
-7.20962	57.6179	52	-25.2	0.6	-3.93	0.13	6.24	w/c 08.03.2012	LOCH FADA NORTH UIST
-6.97341	57.7935	33	-27.7	0.5	-3.78	0.11	2.54	w/c 26.03.2012	LOCH LANGAVAT HARRIS
-6.94541	56.4655	22	-25.7	0.3	-3.89	0.37	5.42	09.11.2011	LOCH A PHUILL
-6.90069	57.7861	9	-20.4	0.2	-2.36	0.15	-1.52	w/c 30.04.2012	LOCH HUMNAVAT (HARRIS)
-6.76116	58.2394	32	-27.1	0.9	-3.23	0.16	-1.26	w/c 26.03.2012	LOCH NA MUILNE (LEWIS)
-6.75676	57.9107	20	-30.2	0.8	-4.3	0.1	4.2	w/c 26.03.2012	UPPER LOCH LACASDALE, HARRIS
-6.7093	58.3151	33	-24.8	1.1	-2.99	0.33	-0.88	w/c 26.03.2012	LOCH RAONAVAT (LEWIS)
-6.65555	58.077	18	-24.3	0.6	-3.19	0.09	1.22	w/c 26.03.2012	LOCH STRANNDABHAT, ISLE OF LEWIS
-6.57651	58.3431	30	-32.6	1	-4.73	0.13	5.24	w/c 08.03.2012	LOCH URRAHAG (LEWIS)
-6.57186	58.0516	14	-27.3	0.7	-3.5	0.24	0.7	w/c 26.03.2012	LOCH SGIOBACLEIT, ISLE OF LEWIS
-6.5679	58.1808	111	-30.4	0.4	-4.11	0.03	2.48	w/c 26.03.2012	LOCH GIL SPEIREIG (LEWIS)
-6.55095	58.3635	2	-32.3	0.5	-4.81	0.09	6.18	w/c 08.03.2012	LOCH MOR BHARABHAIS, ISLE OF LEWIS
-6.53184	58.159	43	-27.7	0.9	-3.77	0.18	2.46	w/c 30.04.2012	LOCH THOTA BRIDEIN (LEWIS)
-6.51535	58.1193	32	-27.9	0.2	-3.6	0.05	0.9	w/c 30.04.2012	LOCH NA EILEAN LIATH (LEWIS)
-6.49628	58.1133	32	-27.1	0.8	-3.8	0.03	3.3	w/c 26.03.2012	LOCH NAN RITHEANAN
-6.49271	58.1605	79	-28.8	0.5	-3.73	0.05	1.04	w/c 30.04.2012	LOCH SANDAVAT (LEWIS)
-6.47392	58.1736	64	-27.5	0.1	-3.22	0.06	-1.74	w/c 30.04.2012	LOCH LEINISCAL (LEWIS)
-6.41175	55.7586	15	-21.71	0.92	-3.24	0.05	4.21	24.05.2012	LOCH GORM
-6.29897	55.6236	72	-24.09	0.78	-3.67	0.03	5.27	24.05.2012	LOWER GLENASTLE LOCH
-6.29008	55.6212	72	-23.36	0.85	-3.75	0.17	6.64	24.05.2012	GLENASTLE LOCH
-6.24282	55.792	26	-27.97	0.32	-4.17	0.09	5.39	24.05.2012	LOCH SKERROLS
-6.1708	57.4896	142	-40.9	1	-6.04	0.2	7.42	26.09.2011	LOCH LEATHAN (ISLE OF SKYE)
-6.13846	55.8127	90	-28.98	0.88	-4.74	0.05	8.94	24.05.2012	LOCH LOSSIT
-6.043	56.5482	82	-38.7	0.8	-5.47	0.18	5.06	05.09.2011	LOCH FRISA
-5.97735	56.4811	18	-45.7	0.7	-6.13	0.42	3.34	05.09.2011	LOCH BA, ISLE OF MULL
-5.7875	56.7442	2	-47.6	0.3	-5.75	0.5	-1.6	29.08.2011	LOCH SHIEL
-5.77647	56.5886	11	-46.3	1.1	-6.38	0.33	4.74	03.10.2011	LOCH ARIENAS
-5.71589	56.7842	20	-45.7	0.5	-6.64	0.13	7.42	16.07.2012	RIVER MOIDART by BRUNERY WOOD
-5.62979	57.747	117	-38.8	1.5	-5.25	0.42	3.2	02.08.2011	LOCH TOLLAIDH
-5.61111	57.6862	150	-44.4	0.6	-6.45	0.09	7.2	02.08.2011	LOCH BAD AN SCALAIG
-5.5978	56.7486	12	-48.8	0.7	-6.64	0.28	4.32	14.09.2011	LOCH DOILET
-5.59571	57.9132	24	-34.2681		-5.11287			Jan-March 2005	Loch Dubh Camas an Lochain
-5.58681	56.7501	10	-39.4217		-6.11092			Jan-March 2005	Loch Doilean
-5.58124	57.7424	11	-47.1	0.4	-6.81	0.09	7.38	02.08.2011	LOCH MAREE
-5.57942	57.5134	41	-44.2	0.6	-6.36	0.16	6.68	16.08.2011	LOCH DAMH SWC
-5.46474	57.4997	352	-46.3254		-6.86361			Jan-March 2005	Loch Nan Eion
-5.44745	56.7828	232	-37.4363		-5.96458			Jan-March 2005	Lochan Dubh
-5.43237	56.3841	14	-43.3	0.7	-5.84	0.16	3.42	20.10.2011	LOCH NELL
-5.43059	57.4917	238	-46.3		-6.7			Jan-March 2005	Loch Coire Fionnaraich
-5.3823	58.0503	100	-26.3404		-3.70412			Jan-March 2005	Loch na Creige Duibhe
-5.34691	57.5622	93	-45.9736		-6.86911			Jan-March 2005	Loch Clair
-5.33096	58.063	22	-39.2	1	-5.43	0.07	4.24	09.08.2011	LOCH OSGAIG
-5.25167	56.9283	358	-60	2.25	-7.85	0.63	14.28	15.09.2011	LOCH ERICHT
-5.24237	57.7969	517	-47.5193		-7.24734			Jan-March 2005	Loch Toll an Lochain
-5.19655	58.0326	61	-43.6	0.6	-6.25	0.22	6.4	August 2011	LOCH LURGAINN
-5.18729	57.5219	154	-47.1	1.1	-6.75	0.22	6.9	16.08.2011	LOCH SGAMHAIN
-5.13745	58	84	-38.1324		-5.38844			Jan-March 2005	Lochan an Dubha
-5.09995	57.7281	259	-50.8	1	-7.28	0.14	7.44	02.08.2011	LOCH A BHRAOIN
-5.09503	57.9109	80	-53.7	0.9	-7.11	0.18	3.18	31.08.2011	LOCH ACHALL
-5.0665	58.0448	230	-36.4649		-5.96285			Jan-March 2005	Lochan Fhionnlaidh
-5.05146	58.206	428	-37.5		-5.9			Jan-March 2005	Loch Bealach Cornaidh
-5.04162	58.0611	114	-44.4	0.8	-6.33	0.18	6.24	09.08.2011	LOCH VEYATIE
-5.04153	57.0882	240	-41.4039		-6.15559			Jan-March 2005	Loch Bad an Losguinn
-5.01565	57.1477	222	-54.8	0.7	-7.2	0.42	2.8	01.09.2011	LOCH CLUANIE
-5.01349	58.18	117	-41.9915		-5.90286			Jan-March 2005	Lochan Feoir
-5.01189	58.2214	164	-40.7932		-5.6982			Jan-March 2005	Loch nan Eun
-5.01125	56.954	66	-51.6	0.9	-7.18	0.37	5.84	29.09.2011	LOCH ARKAIG
-4.9843	56.0415	31	-43.8	0.8	-6.38	0.27	7.24	02.11.2011	LOCH ECK
-4.98073	56.9334	28	-51.1	1.2	-7.17	0.23	6.26	31.08.2011	LOCH LOCHY
-4.94772	58.3429	37	-44.8	0.5	-6.6	0.23	8	11.08.2011	LOCH STACK
-4.93617	58.6569	90	-35.0108		-4.959			Jan-March 2005	Loch a Chem Alltain
-4.92094	57.0796	83	-54.3	0.2	-7.59	0.31	6.42	27.09.2011	LOCH GARRY
-4.81075	57.7011	257	-56.7	1.1	-7.69	0.15	4.82	31.08.2011	LOCH GLASCARNOCH
-4.75411	56.6085	300	-55.7	0.1	-7.49	0.13	4.22	07.09.2011	LOCH BA
-4.75399	56.5934	294	-39.3619		-5.8478			Jan-March 2005	Loch na Achlaise
-4.73743	58.2414	111	-52.1	0.6	-7.18	0.43	5.34	06.10.2011	LOCH MERKLAND
-4.67665	56.2178	12	-44.1	0.3	-5.41	0.05	2.78	25.11.2011	LOCH LOMOND (North)
-4.64401	56.6515	282	-46.0228		-6.70187			Jan-March 2005	Loch Laidon
-4.64297	57.5965	66	-55.9	0.7	-7.84	0.15	6.82	25.08.2011	LOCH GARVE
-4.63474	55.0317	112	-32.3	0.6	-4.56	0.22	4.18	11.10.2011	LOCH OCHILTREE
-4.62179	58.4738	12	-48.3	0.4	-7.01	0.09	7.78	16.08.2011	LOCH HOPE
-4.6135	57.5747	33	-45.5	0.5	-6.19	0.13	4.02	19.09.2011	LOCH ACHILTY
-4.59876	57.1517	302	-53.9	0.8	-6.9	0.32	1.3	18.08.2011	LOCH TARFF
-4.59145	56.6831	294	-55	0.5	-7.49	0.43	4.92	11.08.2011	LOCH LAIDON
-4.58583	56.0645	16	-44.5	0.6	-5.13	0.08	0.14	25.11.2011	LOCH LOMOND (South)
-4.53597	56.9294	286	-50.6	0.5	-7.25	0.16	7.4	08.09.2011	LOCH LAGGAN
-4.53522	56.2056	91	-52.5	0.3	-7.12	0.27	4.46	17.08.2011	LOCH CHON
-4.51698	56.534	345	-56.6	0.7	-8.37	0.15	10.36	23.06.2011	LOCH LYON
-4.51436	56.6782	282	-61.5	0.5	-8.15	0.2	3.7	11.08.2011	LOCH EIGHEACH
-4.5099	56.2283	420	-44.9429		-6.50044			Jan-March 2005	Loch Tinker
-4.50576	57.5819	129	-42.6	0.5	-5.15	0.39	-1.4	19.09.2011	LOCH USSIE
-4.44928	56.1832	36	-52.6	0.2	-7.02	0.37	3.56	17.08.2011	LOCH ARD
-4.42168	58.0336	104	-50.9	0.3	-7.3	0.7	7.5	06.10.2011	LOCH SHIN
-4.39218	56.2279	87	-51.3	1.1	-6.95	0.09	4.3	16.08.2011	LOCH ACHRAY
-4.38708	55.0874	225	-31.2	0.6	-5.67	0.28	14.16	25.10.2011	LOCH DEE
-4.37398	58.3701	113	-46.4	0.8	-6.73	0.05	7.44	16.08.2011	LOCH LOYAL
-4.36135	58.2989	82	-47.8	0.8	-6.73	0.16	6.04	16.08.2011	LOCH NAVER
-4.33931	56.4203	290	-46.2771		-6.96937			Jan-March 2005	Lochan Lairig Cheile
-4.33468	57.3976	115	-55.1	0.8	-7.75	0.16	6.9	18.08.2011	LOCH NESS
-4.28558	56.2669	122	-54.7	0.6	-7.1	0.41	2.1	16.08.2011	LOCH LUBNAIG
-4.27844	57.8844	40	-52	0.4	-7.06	0.37	4.48	13.09.2011	LOCH MIGDALE
-4.26746	57.3244	230	-50.2	0.6	-6.55	0.16	2.2	18.08.2011	LOCH RUTHVEN
-4.2631	56.2296	140	-53.1	0.1	-7.32	0.36	5.46	16.08.2011	LOCH VENACHAR
-4.25505	57.3611	217	-46	0.9	-6.1	0.1	2.8	18.08.2011	LOCH DUNTELCHAIG
-4.24001	58.1339	400	-38.4718		-5.53104			Jan-March 2005	Loch Dubh Cadhafuaraich
-4.14973	58.5221	115	-39.8	0.6	-5.38	0.13	3.24	16.08.2011	LOCH MEADIE
-4.11558	56.3906	97	-56.2	1.3	-8.19	0.47	9.32	08.08.2011	LOCH EARN
-4.01843	56.5816	106	-57.1	0.8	-7.67	0.14	4.26	27.07.2011	LOCH TAY
-3.94183	58.048	38	-59.1	0.2	-7.81	0.15	3.38	23.08.2011	LOCH BRORA
-3.9217	57.1164	217	-63.2	0.4	-7.56	0.05	-2.72	25.08.2011	LOCH INSH
-3.82557	56.5117	270	-62.5	0.4	-8.34	0.16	4.22	30.08.2011	LOCH FREUCHIE
-3.7032	57.1669	319	-63.5	0.4	-8.48	0.19	4.34	25.08.2011	LOCH MORLICH
-3.69795	57.4128	296	-54.8	0.3	-6.73	0.28	-0.96	09.08.2011	LOCHINDORB
-3.6123	55.3643	339	-45.5	0.1	-6.82	0.22	9.06	28.09.2011	DAER RESERVOIR
-3.58079	58.3974	122	-45.6	0.4	-5.62	0.03	-0.64	18.08.2011	LOCH MORE
-3.5756	58.511	68	-36.4	0.7	-4.8	0.06	2	18.08.2011	LOCH CALDER
-3.53435	56.5676	123	-61.95	0.7	-8.68	0.14	7.44	16.04.2011	LOCH OF LOWES
-3.5006	56.5345	37	-60.5	0.9	-8.9	0.21	10.7	16.04.2011	RIVER TAY
-3.43362	56.5683	55	-63.8	0.1	-9.12	0.14	9.16	16.04.2011	CLUNIE LOCH
-3.4132	57.4133	152	-55.4	1.3	-8.49	0.22	12.52	17.06.2012	RIVER SPEY
-3.39222	57.4114	142	-65.6	0.5	-9.7	0.13	12	n.a.	CRAGGANMORE
-3.30057	59.1247	14	-32.7	0.8	-4.53	0.08	3.54	18.04.2012	BOARDHOUSE LOCH
-3.23333	56.9584	785	-60.0296		-9.02966			Jan-March 2005	Lochnagar
-3.2179	59.1468	41	-31.5	0.1	-4.19	0.19	2.02	18.04.2012	SWANNAY LOCH
-3.20112	56.7173	310	-61.7	1	-9.18	0.04	11.74	14.05.2011	BLACKWATER RESEVOIR
-3.1845	56.6675	200	-61.5	0.3	-8.92	0.09	9.86	14.05.2011	LINTRATHEN LOCH
-3.16013	56.9454	399	-62	0.7	-9.12	0.59	-1.12	22.09.2011	LOCH MUICK
-3.15865	55.5019	248	-50.2	1	-7.5	0.04	9.8	04.10.2011	ST MARYS LOCH
-3.09801	58.9489	16	-33	0.5	-4.59	0.17	3.72	18.04.2012	KIRBISTER LOCH
-3.00011	56.601	78	-59.8	0.3	-8.6	0.27	9	21.04.2011	RIVER DEAN
-2.92277	57.0783	160	-54.5	0.6	-6.51	0.21	-2.42	29.08.2011	LOCH KINORD
-2.90077	56.7667	244	-59.8	0.2	-8.7	0.05	9.8	23.07.2011	RIVER BY NOLAN WATER/RIVER
-2.90019	56.7516	244	-61	0.1	-8.88	0.05	10.04	23.07.2011	GLEN OGIL RESERVOIR
-2.77624	56.6539	59	-55.2	0.6	-7.16	0.2	2.08	23.07.2011	RESCOBIE LOCH
-1.33585	59.9419	8	-31.4	0.7	-4.27	0.57	2.76	10.05.2012	LOCH SPIGGIE
-1.22412	60.2421	30	-33.5	0.7	-4.34	0.04	1.22	2011	LOCH OF GIRLSTA
-0.889168	60.801	5	-31.6	0.3	-4.28	0.17	2.64	07.05.2012	LOCH OF CLIFF
Entries formatted bold and in Italics are precipitation data from the British Geological Survey								w/c = week commencing
